# Supplementary material for: Octahydroquinoxalin-2(1H)-One-Based Aminophosphonic Acids and Their Derivatives—Biological Activity towards Cancer Cells
Source: PubMed Central journal article supplement (PMC7287629; doi:10.3390/ma13102393), 2020-05-22
Supplement: materials-13-02393-s001.pdf [file materials-13-02393-s001.pdf]

Supporting Information

# Octahydroquinoxalin-2(1*H*)-One-Based Aminophosphonic Acids and Their Derivatives – Biological Activity Towards Cancer Cells

Jakub Iwanejko <sup>1</sup>, Elżbieta Wojaczyńska <sup>1,\*</sup>, Eliza Turlej <sup>2</sup>, Magdalena Maciejewska <sup>2</sup> and Joanna Wietrzyk <sup>2</sup>

<sup>1</sup> Faculty of Chemistry, Wrocław University of Science and Technology, Wybrzeże Wyspiańskiego 27, 50-370 Wrocław, Poland; jakub.iwanejko@pwr.edu.pl

<sup>2</sup> Department of Experimental Oncology, Hirszfeld Institute of Immunology and Experimental Therapy, Polish Academy of Sciences, Rudolfa Weigla 12, 53-114 Wrocław, Poland; eliza.turlej@hirszfeld.pl (E.T.); magdalena.maciejewska@hirszfeld.pl (M.M.); joanna.wietrzyk@hirszfeld.pl (J.W.)

\* Correspondence: elzbieta.wojaczynska@pwr.edu.pl; Tel.: +48-71-3202410

## Contents

|                                                                                                                                                                                                                                                                                                                          |    |
|--------------------------------------------------------------------------------------------------------------------------------------------------------------------------------------------------------------------------------------------------------------------------------------------------------------------------|----|
| 1. NMR Spectra.....                                                                                                                                                                                                                                                                                                      | 2  |
| <b>Figure S1.</b> (a) <sup>1</sup> H NMR and (b) <sup>13</sup> C NMR spectra of (1 <i>R</i> ,6 <i>R</i> )-3-oxo-2,5-diazabicyclo[4.4.0]dec-4-ene 1.....                                                                                                                                                                  | 2  |
| <b>Figure S2.</b> (a) <sup>1</sup> H NMR, (b) <sup>13</sup> C NMR and (c) <sup>31</sup> P NMR spectra of dimethyl-[(1 <i>R</i> ,6 <i>R</i> )-3-oxo-2,5-diazabicyclo[4.4.0]dec-4-yl]phosphonate 2a.....                                                                                                                   | 4  |
| <b>Figure S3.</b> (a) <sup>1</sup> H NMR, (b) <sup>13</sup> C NMR and (c) <sup>31</sup> P NMR spectra of diphenyl-[(1 <i>R</i> ,6 <i>R</i> )-3-oxo-2,5-diazabicyclo[4.4.0]dec-4-yl]phosphonate 2b.....                                                                                                                   | 5  |
| <b>Figure S4.</b> (a) <sup>1</sup> H NMR, (b) <sup>13</sup> C NMR and (c) <sup>31</sup> P NMR spectra of dibenzyl-[(1 <i>R</i> ,6 <i>R</i> )-3-oxo-2,5-diazabicyclo[4.4.0]dec-4-yl]phosphonate 2c.....                                                                                                                   | 7  |
| <b>Figure S5.</b> (a) <sup>1</sup> H NMR, (b) <sup>13</sup> C NMR and (c) <sup>31</sup> P NMR spectra of ethyl-[(1 <i>R</i> ,6 <i>R</i> )-3-oxo-2,5-diazabicyclo[4.4.0]dec-4-yl](phenyl)phosphinate 2d.....                                                                                                              | 8  |
| <b>Figure S6.</b> (a) <sup>1</sup> H NMR, (b) <sup>13</sup> C NMR and (c) <sup>31</sup> P NMR spectra of (1 <i>R</i> ,6 <i>R</i> )-3-oxo-4-(diphenylphosphoryl)-2,5-diazabicyclo[4.4.0]decan 2e.....                                                                                                                     | 10 |
| <b>Figure S7.</b> (a) <sup>1</sup> H NMR, (b) <sup>13</sup> C NMR and (c) <sup>31</sup> P NMR spectra of 4-((3 <i>aR</i> ,8 <i>aR</i> )-2,2-dimethyl-6-oxido-4,4,8,8-tetraphenyltetrahydro-[1,3]dioxolo[4,5- <i>e</i> ][1,3,2]dioxaphosphepin-6-yl)-(1 <i>R</i> ,6 <i>R</i> )-3-oxo-2,5-diazabicyclo[4.4.0]decan 2f..... | 11 |
| <b>Figure S8.</b> (a) <sup>1</sup> H NMR, (b) <sup>13</sup> C NMR and (c) <sup>31</sup> P NMR spectra of 4-((3 <i>aR</i> ,8 <i>aR</i> )-2,2-dimethyl-6-oxido-4,4,8,8-tetraphenyltetrahydro-[1,3]dioxolo[4,5- <i>e</i> ][1,3,2]dioxaphosphepin-6-yl)-(1 <i>R</i> ,6 <i>R</i> )-3-oxo-2,5-diazabicyclo[4.4.0]decan 2g..... | 13 |
| <b>Figure S9.</b> (a) <sup>1</sup> H NMR, (b) <sup>13</sup> C NMR and (c) <sup>31</sup> P NMR spectra of [(1 <i>R</i> ,6 <i>R</i> )-3-oxo-2,5-diazabicyclo[4.4.0]dec-4-yl]-phosphonic acid 3a.....                                                                                                                       | 14 |
| <b>Figure S10.</b> (a) <sup>1</sup> H NMR, (b) <sup>13</sup> C NMR and (c) <sup>31</sup> P NMR spectra of [4-phenyl-(1 <i>R</i> ,6 <i>R</i> )-3-oxo-2,5-diazabicyclo[4.4.0]dec-4-yl]-phosphonic acid 3b.....                                                                                                             | 16 |

## 1. NMR Spectra

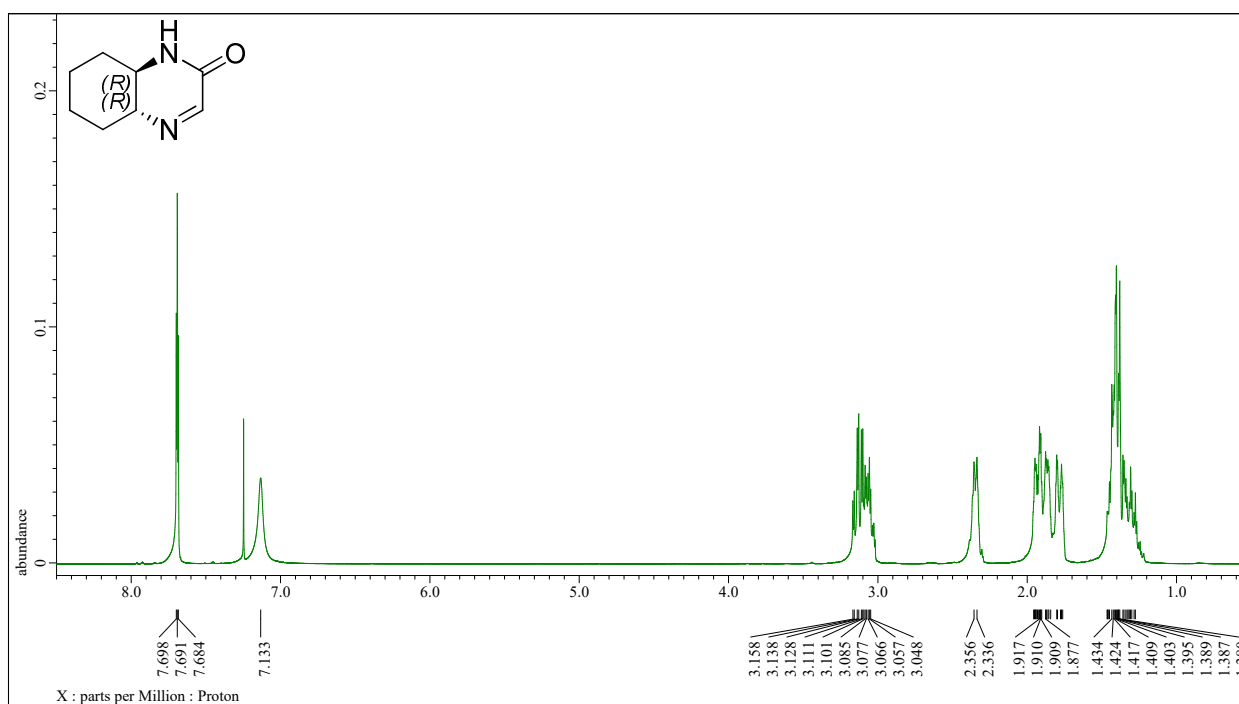

(a)

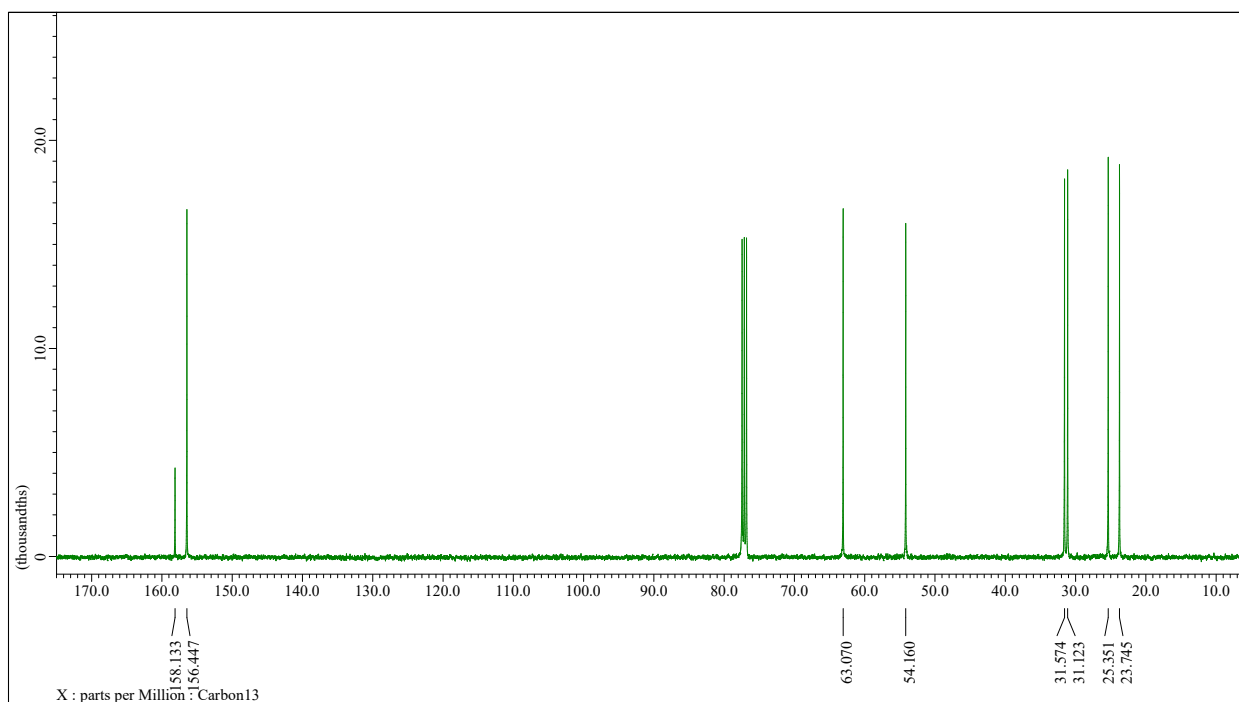

(b)

Figure S1. (a)  $^1\text{H}$  NMR and (b)  $^{13}\text{C}$  NMR spectra of (1*R*,6*R*)-3-oxo-2,5-diazabicyclo[4.4.0]dec-4-ene 1.

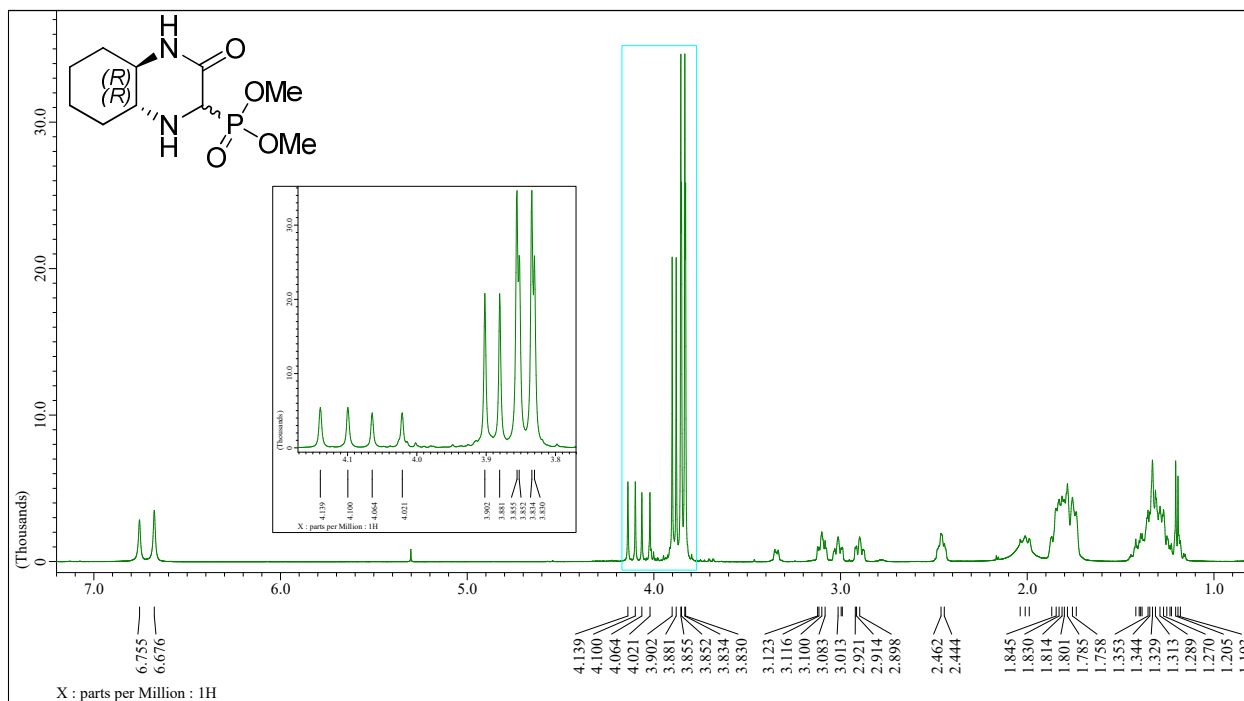

(a)

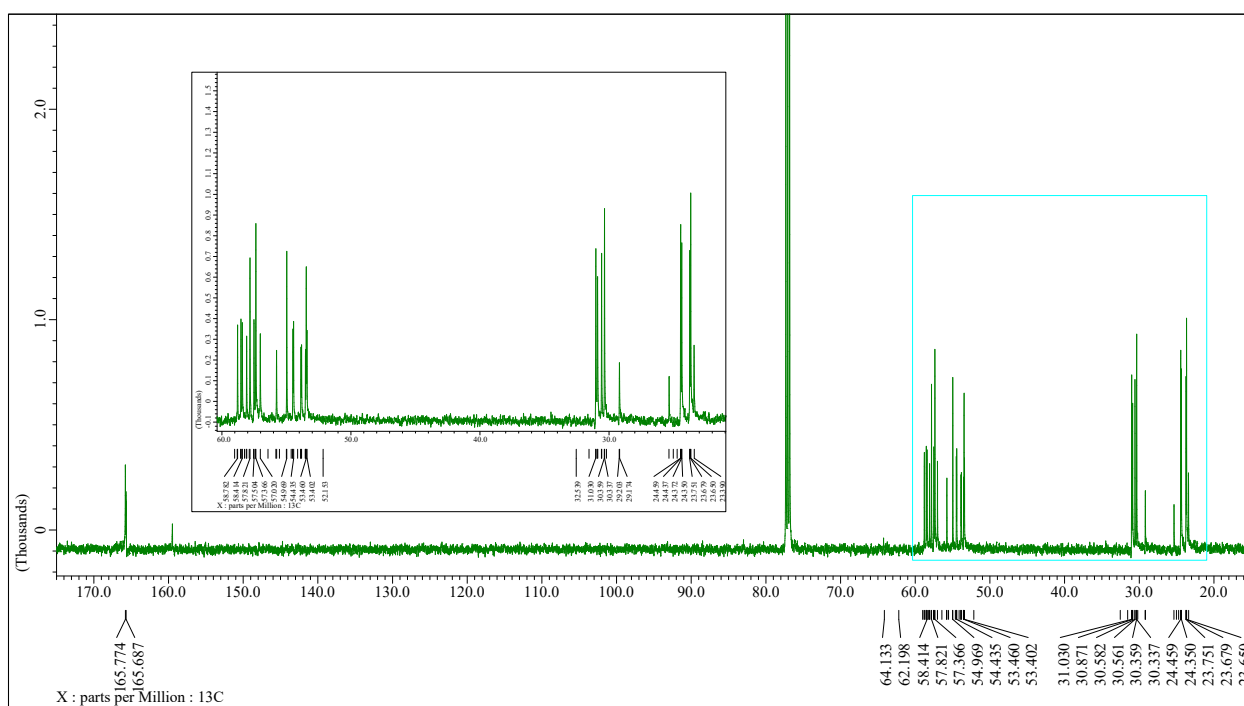

(b)

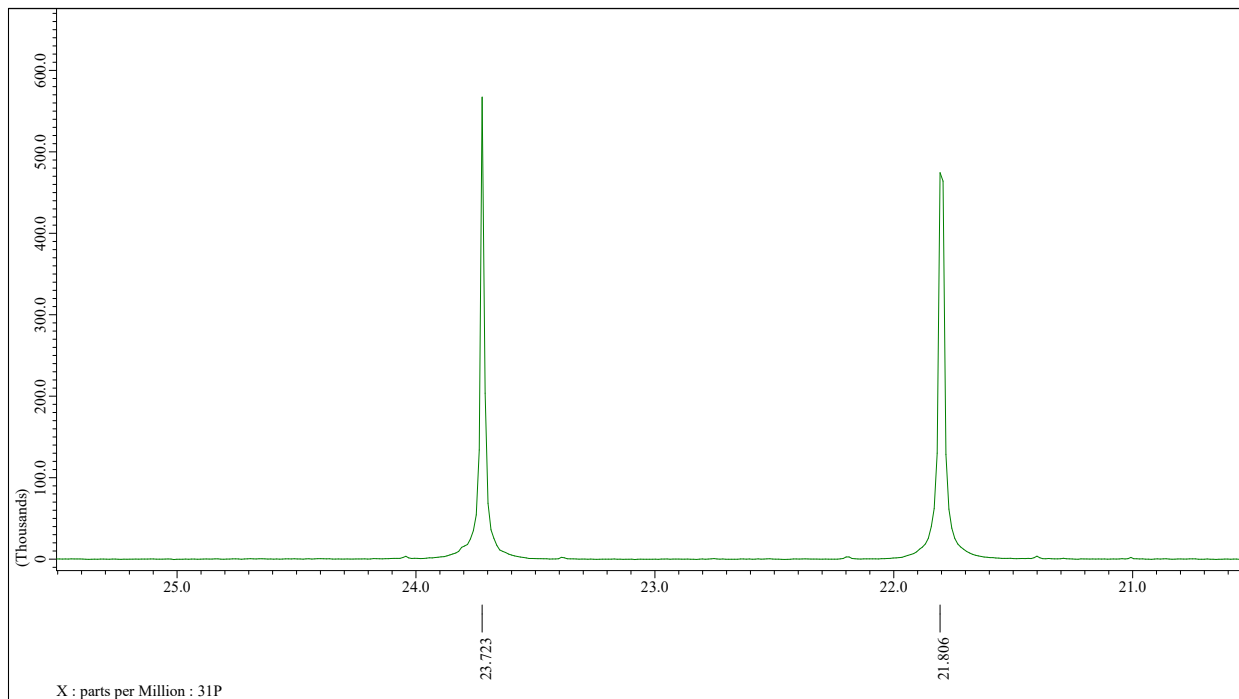

**Figure S2.** (a)  $^1\text{H}$  NMR, (b)  $^{13}\text{C}$  NMR and (c)  $^{31}\text{P}$  NMR spectra of dimethyl-[(1R,6R)-3-oxo-2,5-diazabicyclo[4.4.0]dec-4-yl]phosphonate 2a.

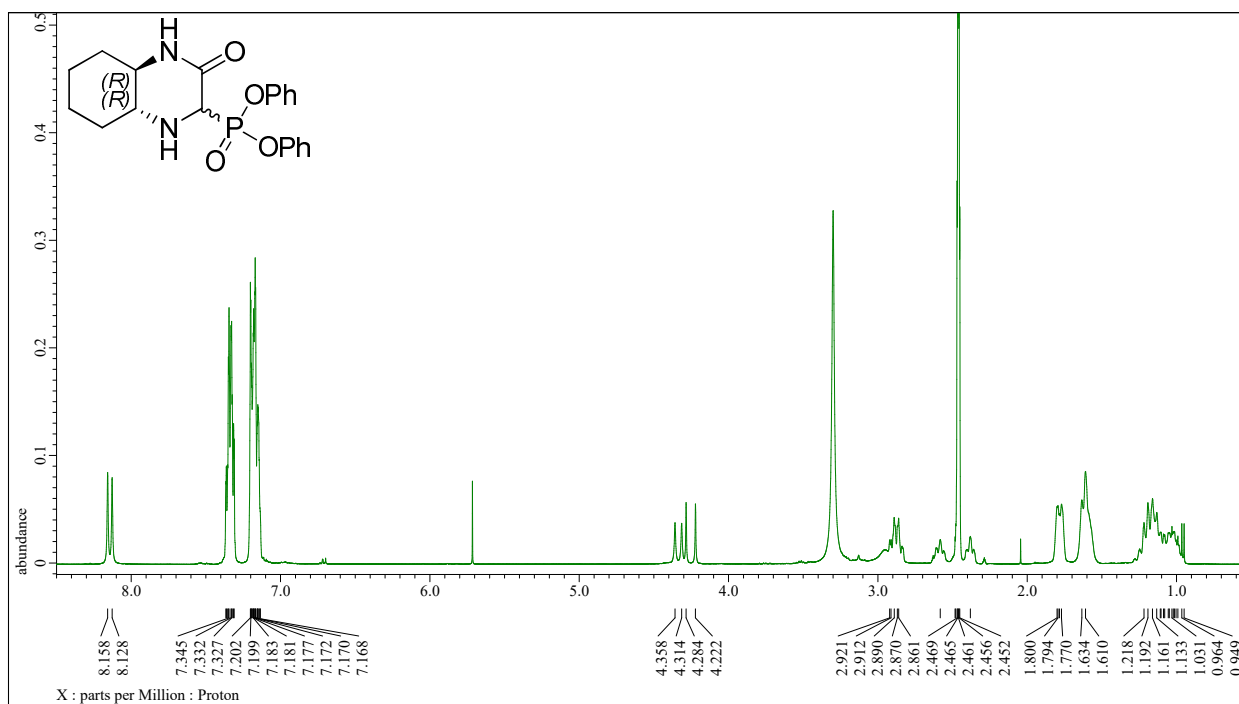

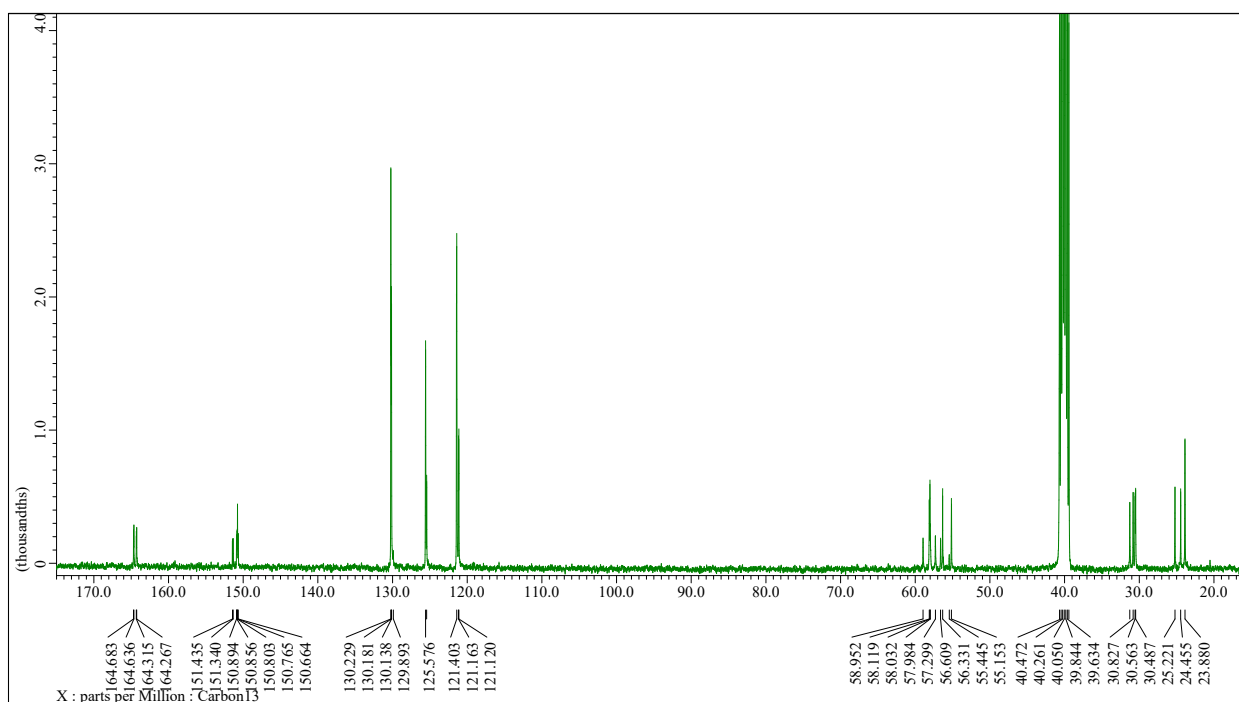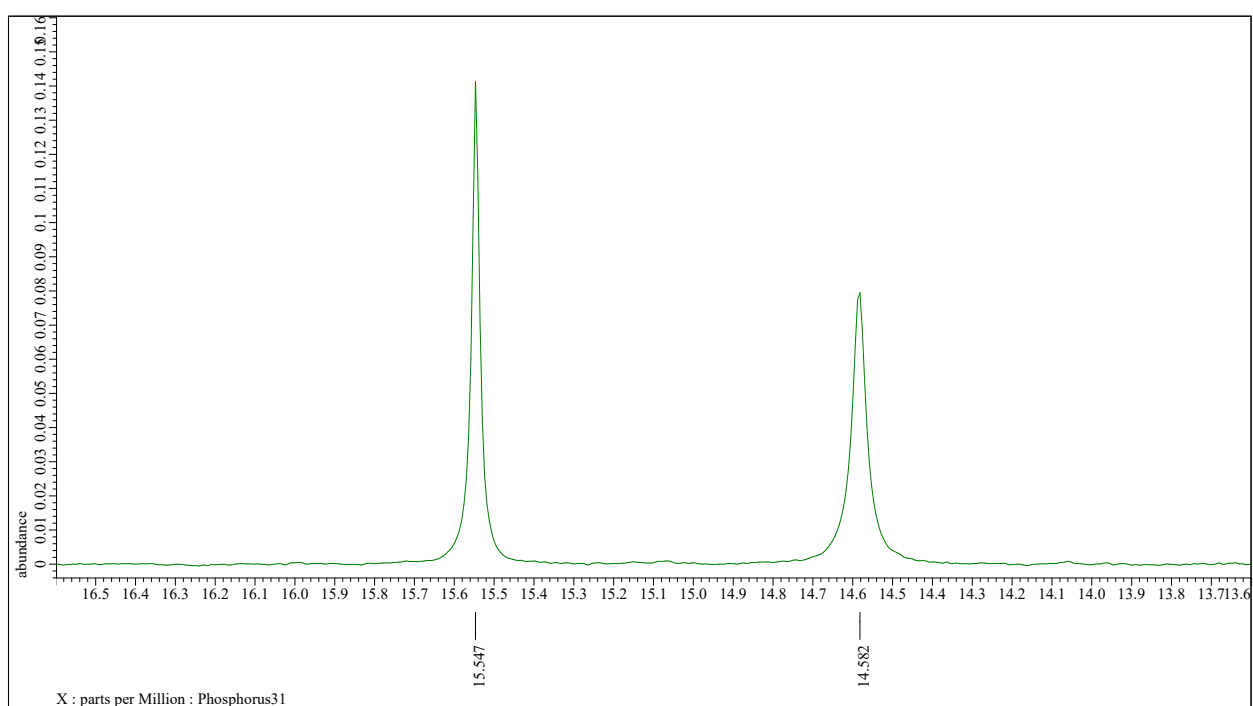

**Figure S3.** (a)  $^1\text{H}$  NMR, (b)  $^{13}\text{C}$  NMR and (c)  $^{31}\text{P}$  NMR spectra of diphenyl-[(1R,6R)-3-oxo-2,5-diazabicyclo[4.4.0]dec-4-yl]phosphonate 2b.

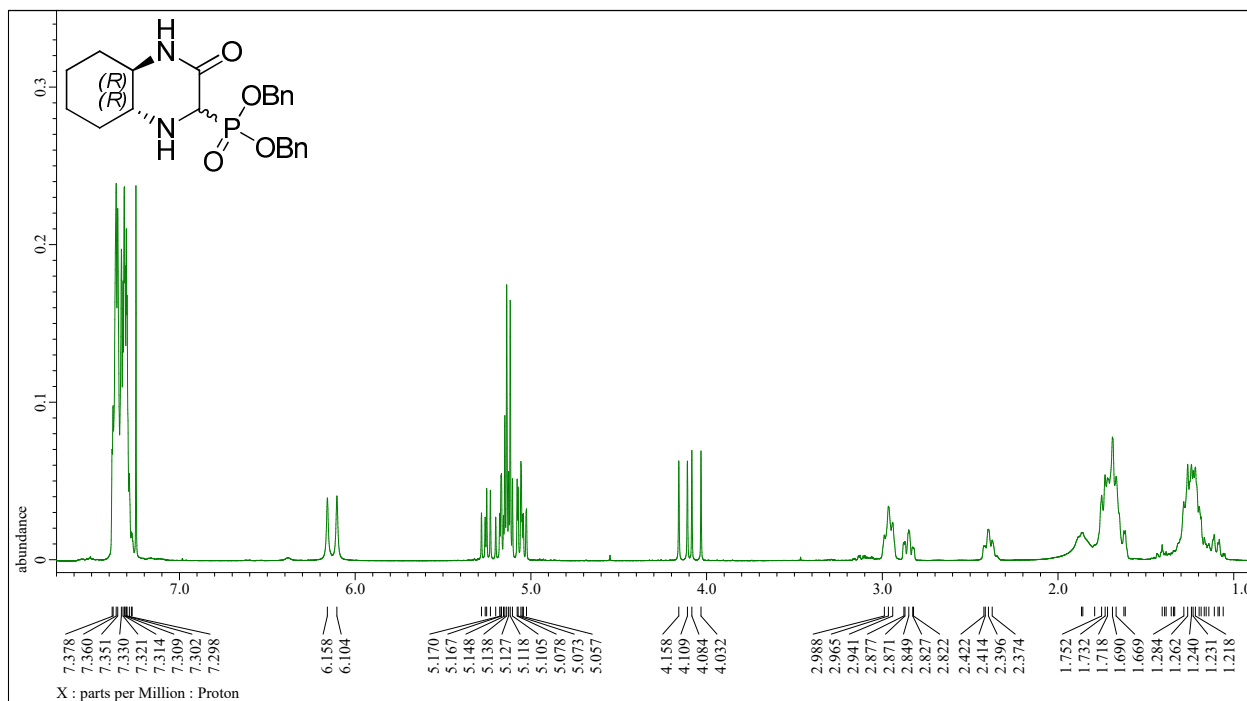

(a)

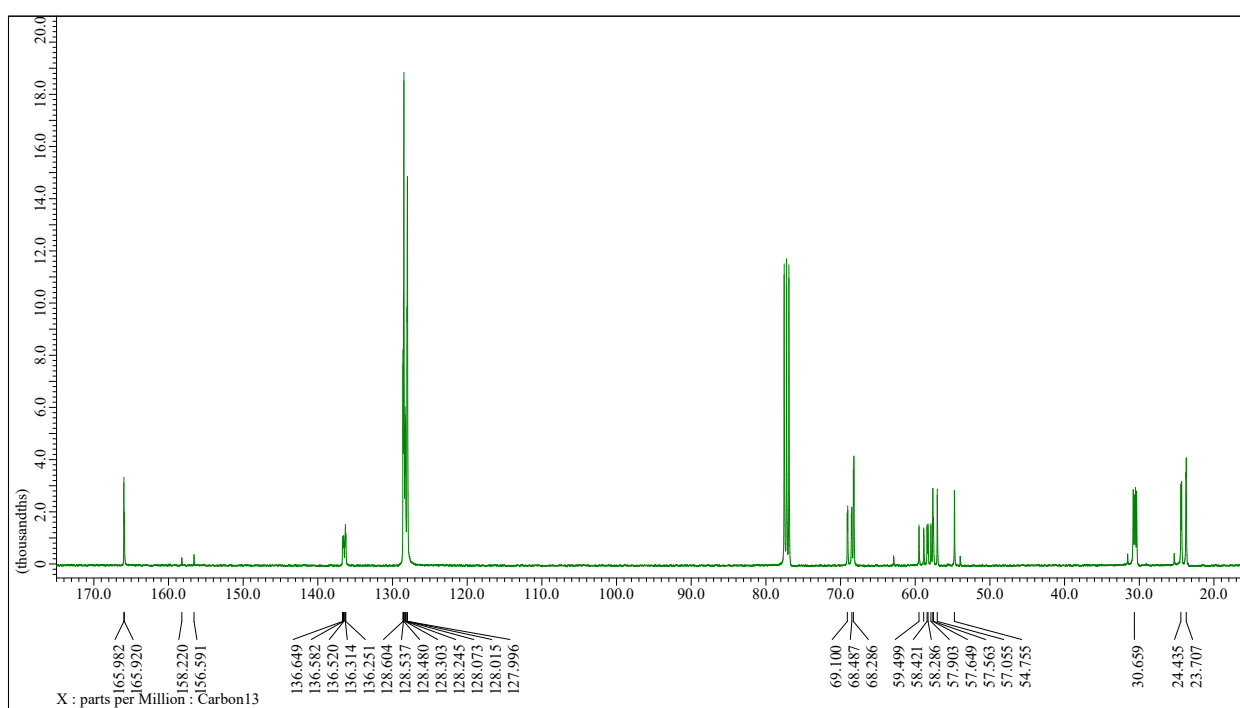

(b)

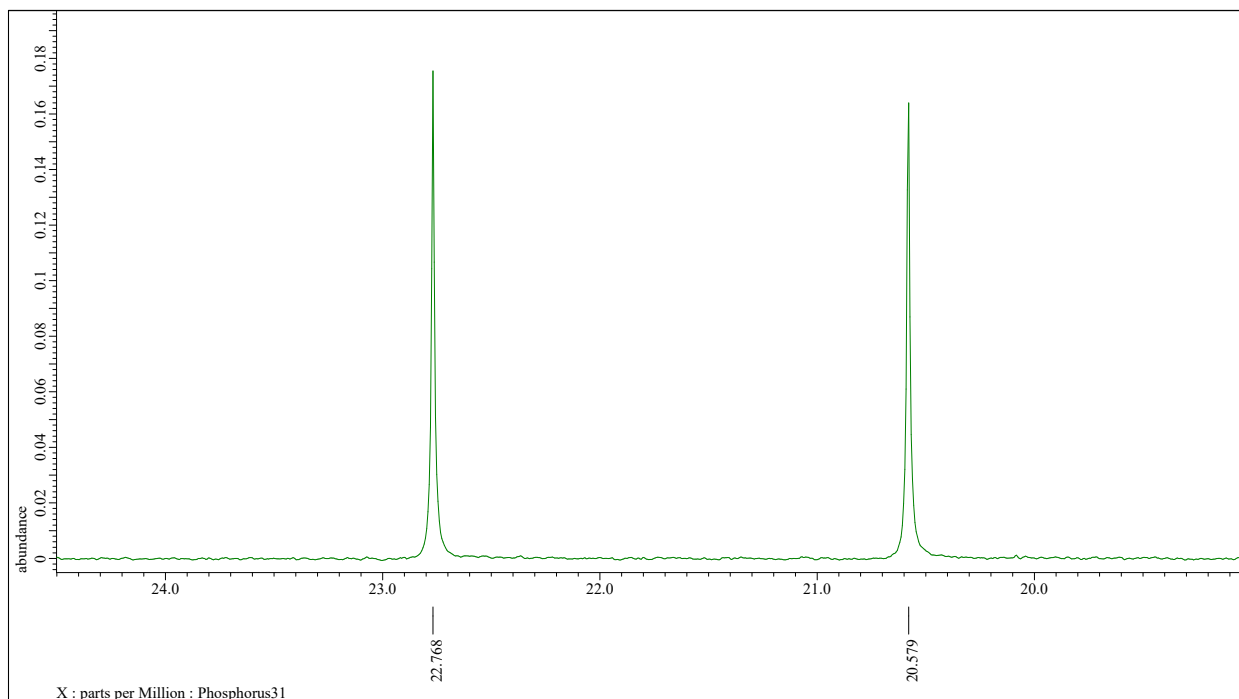

(c)

**Figure S4.** (a)  $^1\text{H}$  NMR, (b)  $^{13}\text{C}$  NMR and (c)  $^{31}\text{P}$  NMR spectra of dibenzyl-[(1R,6R)-3-oxo-2,5-diazabicyclo[4.4.0]dec-4-yl]phosphonate 2c.

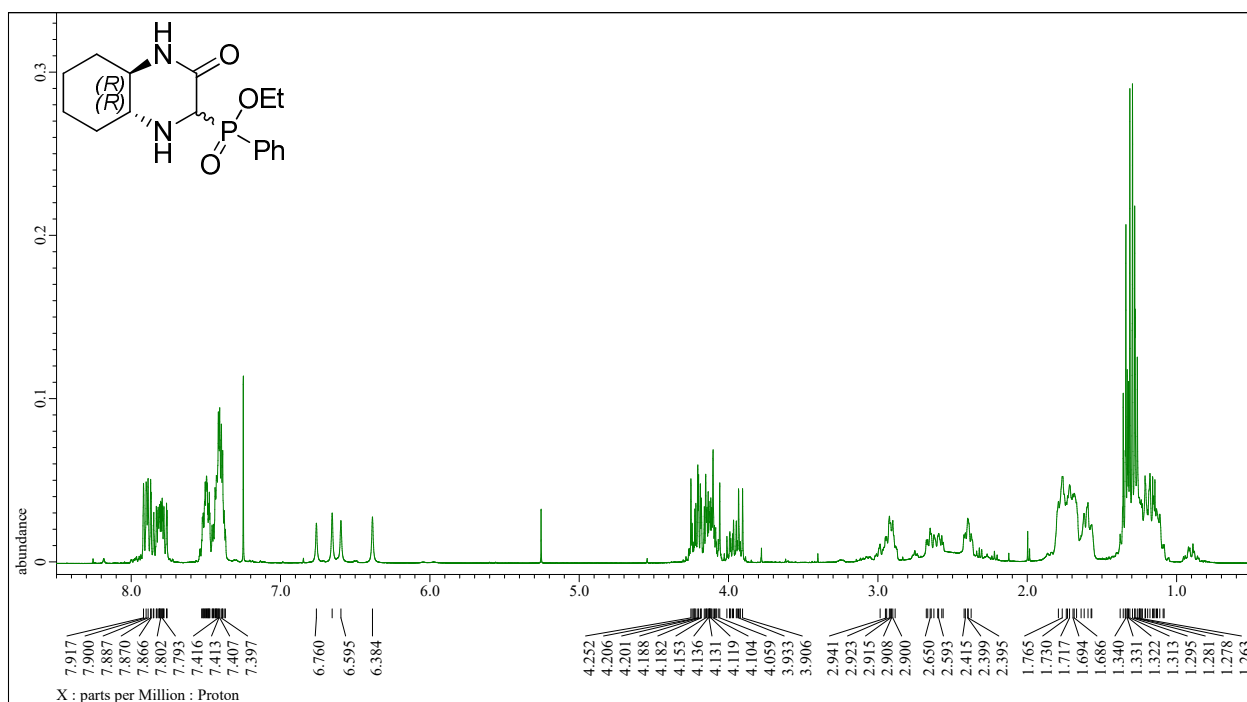

(a)

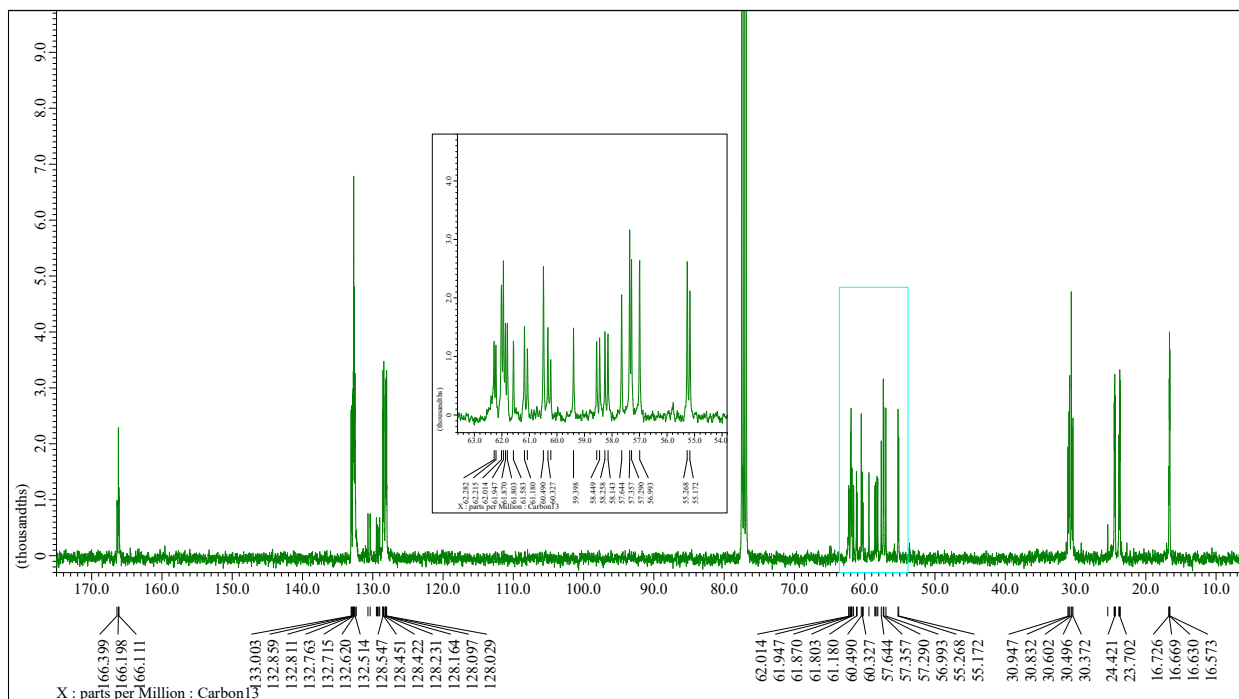

(b)

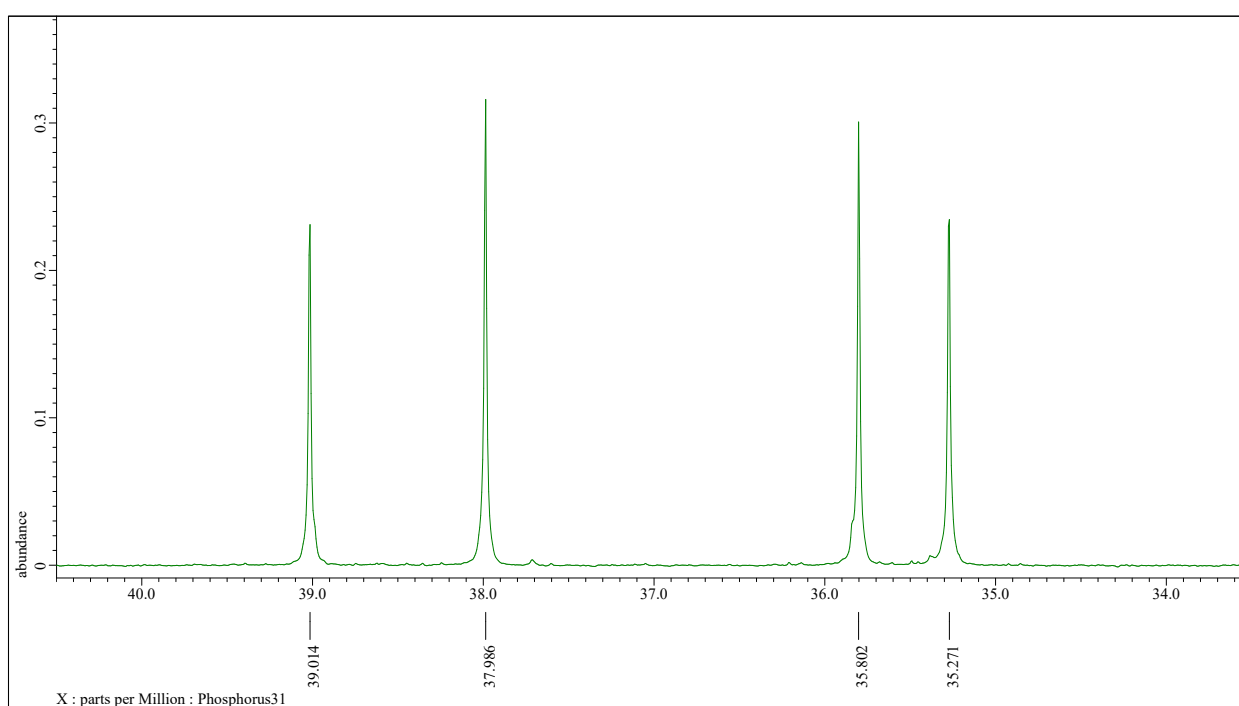

(c)

**Figure S5.** (a)  $^1\text{H}$  NMR, (b)  $^{13}\text{C}$  NMR and (c)  $^{31}\text{P}$  NMR spectra of ethyl-[(1R,6R)-3-oxo-2,5-diazabicyclo[4.4.0]dec-4-yl](phenyl)phosphinate 2d.



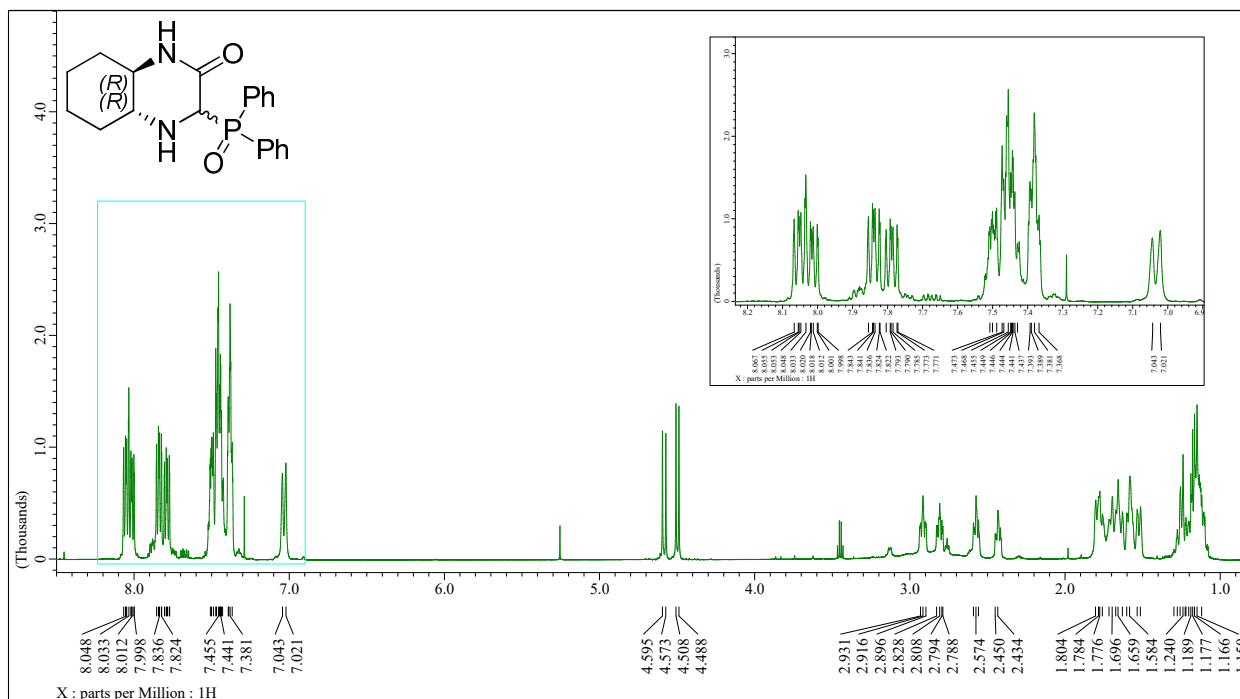

(a)

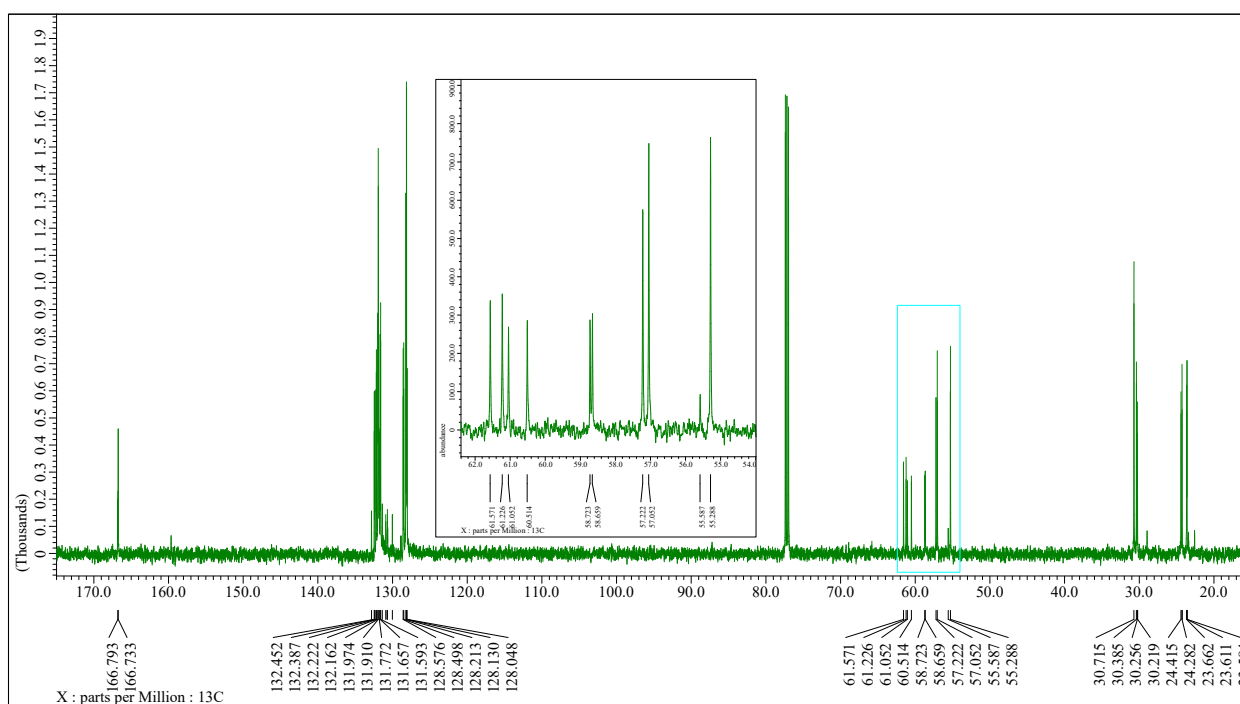

(b)

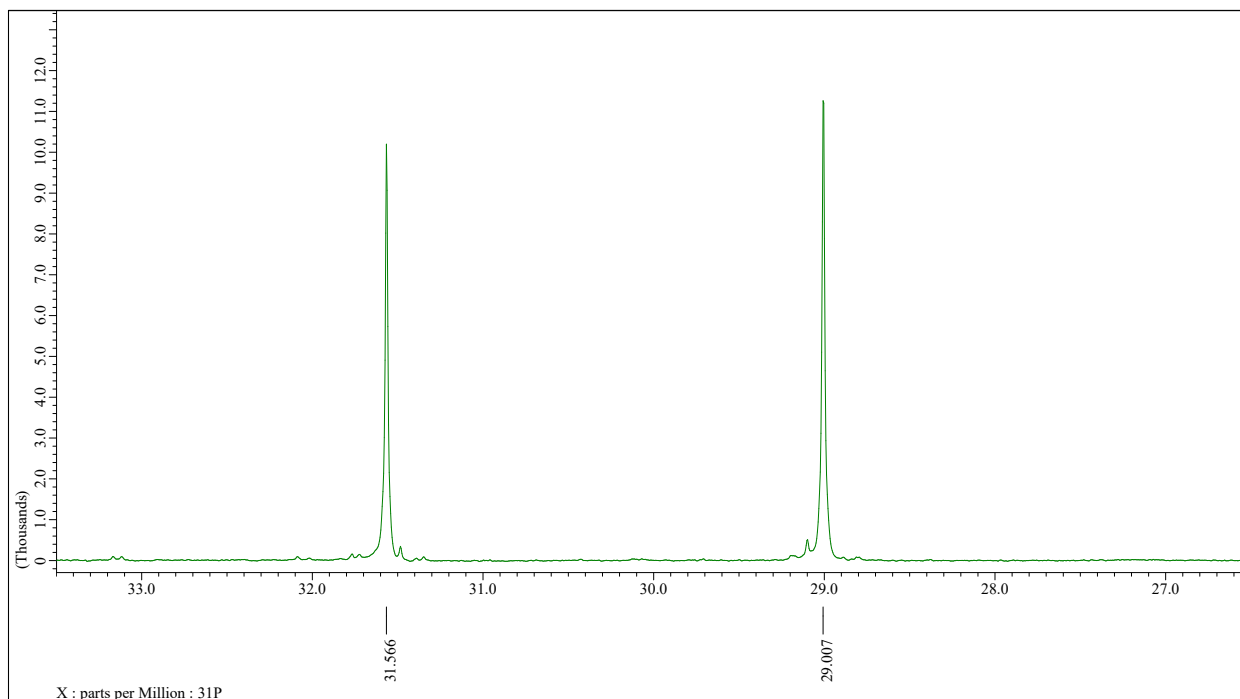

(c)

**Figure S6.** (a)  $^1\text{H}$  NMR, (b)  $^{13}\text{C}$  NMR and (c)  $^{31}\text{P}$  NMR spectra of (1*R*,6*R*)-3-oxo-4-(diphenylphosphoryl)-2,5-diazabicyclo[4.4.0]decan 2e.

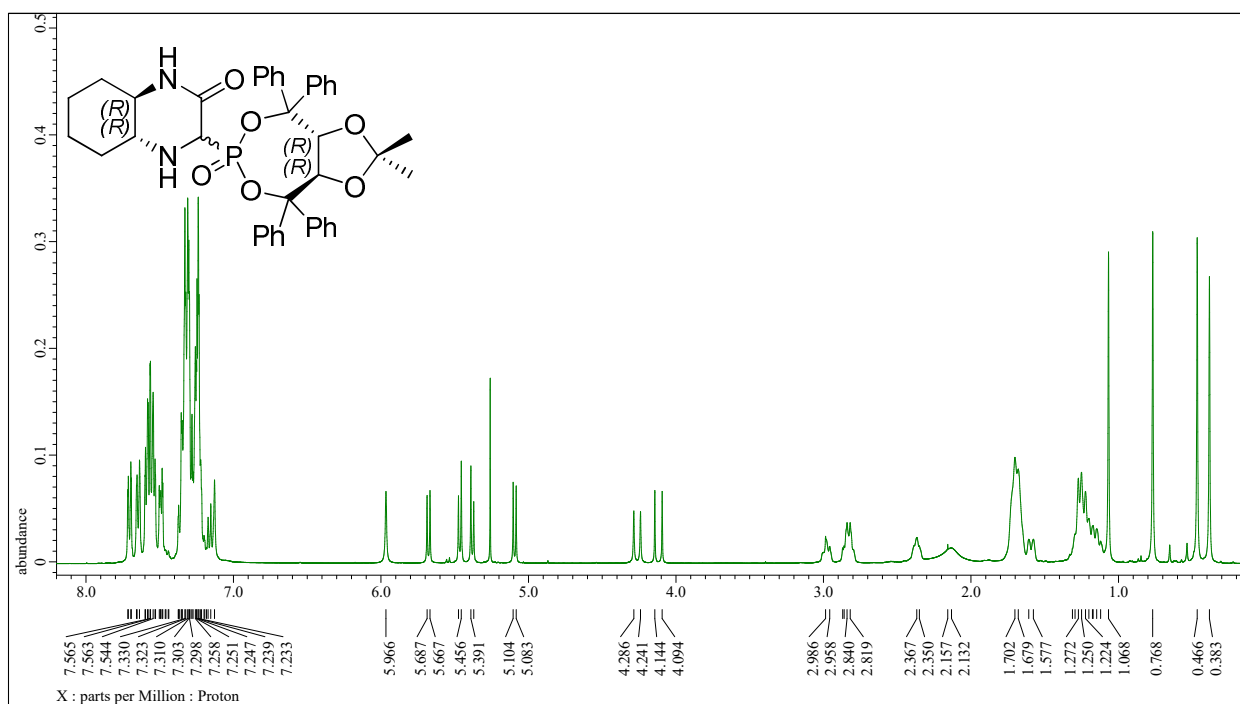

(a)

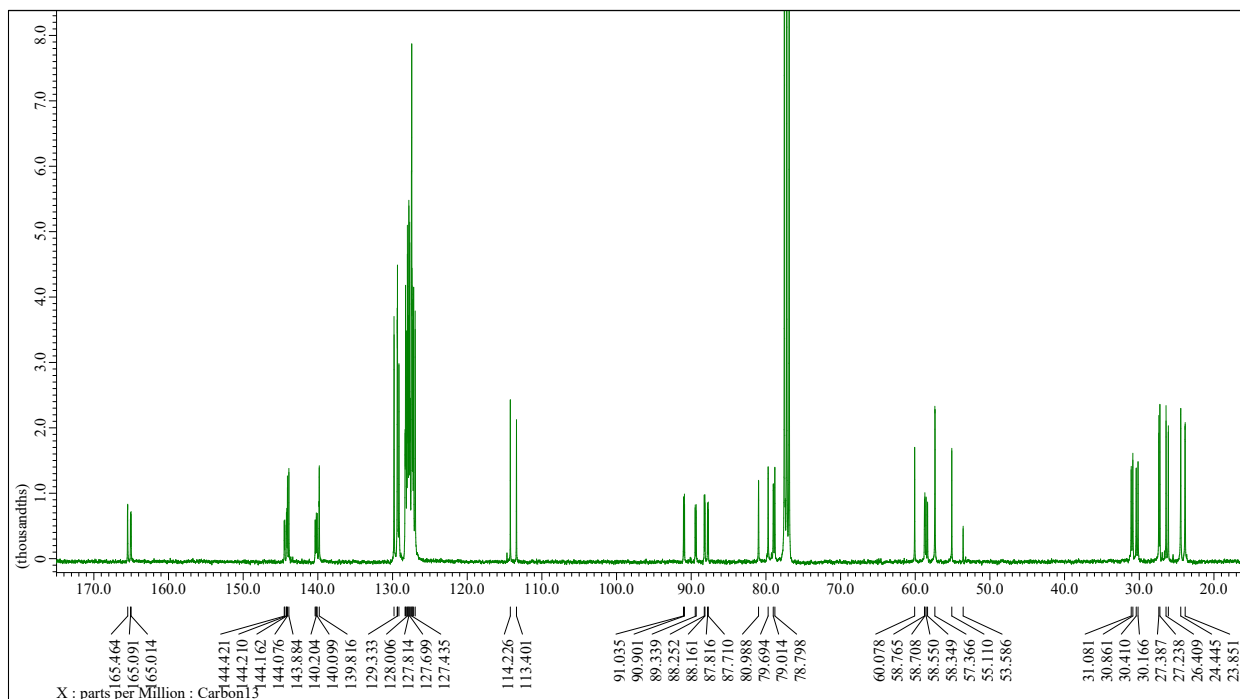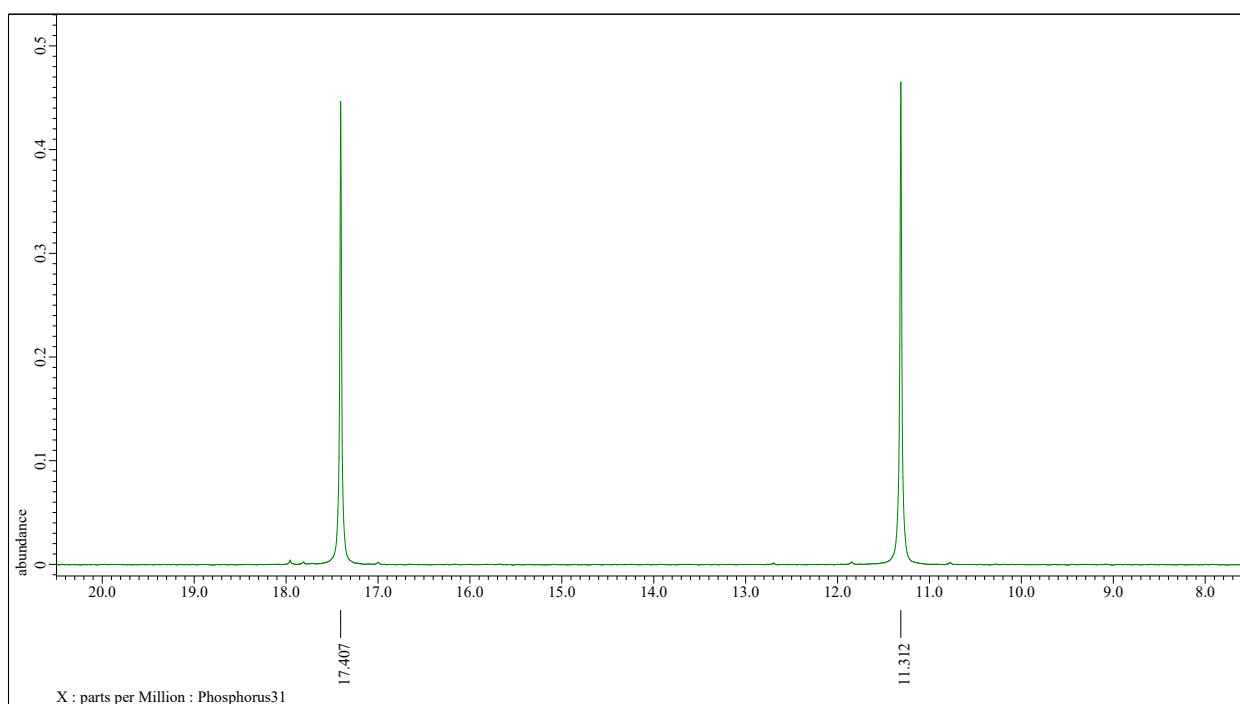

**Figure 7.** (a)  $^1\text{H}$  NMR, (b)  $^{13}\text{C}$  NMR and (c)  $^{31}\text{P}$  NMR spectra of 4-((3*aR*,8*aR*)-2,2-dimethyl-6-oxido-4,4,8,8-tetraphenyltetrahydro-[1,3]dioxolo[4,5-*e*][1,3,2]dioxaphosphepin-6-yl)-(1*R*,6*R*)-3-oxo-2,5-diazabicyclo[4.4.0]decan 2*f*.

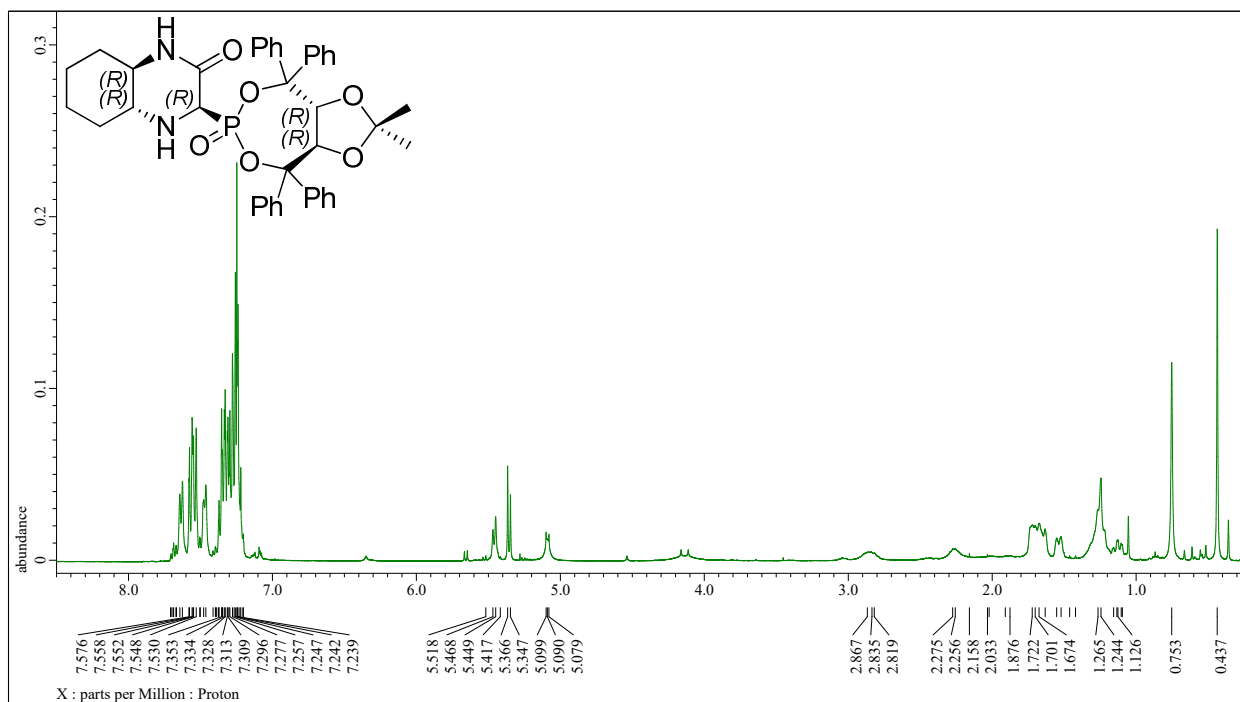

(a)

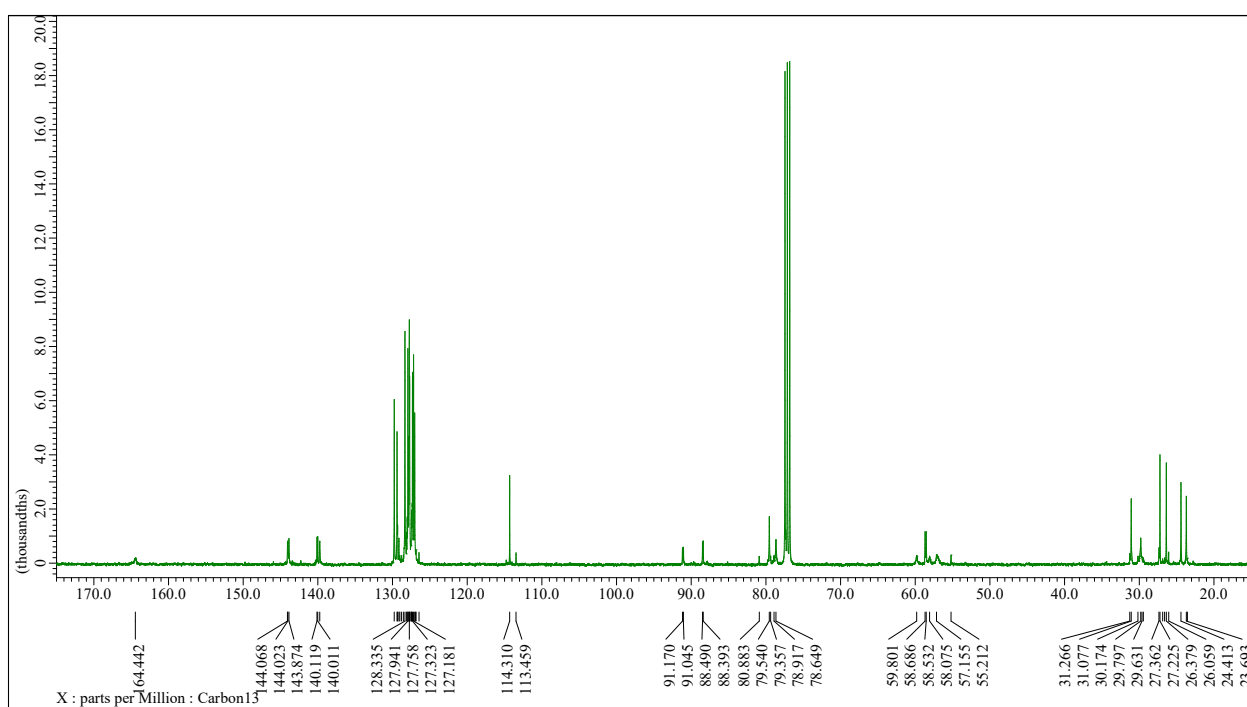

(b)

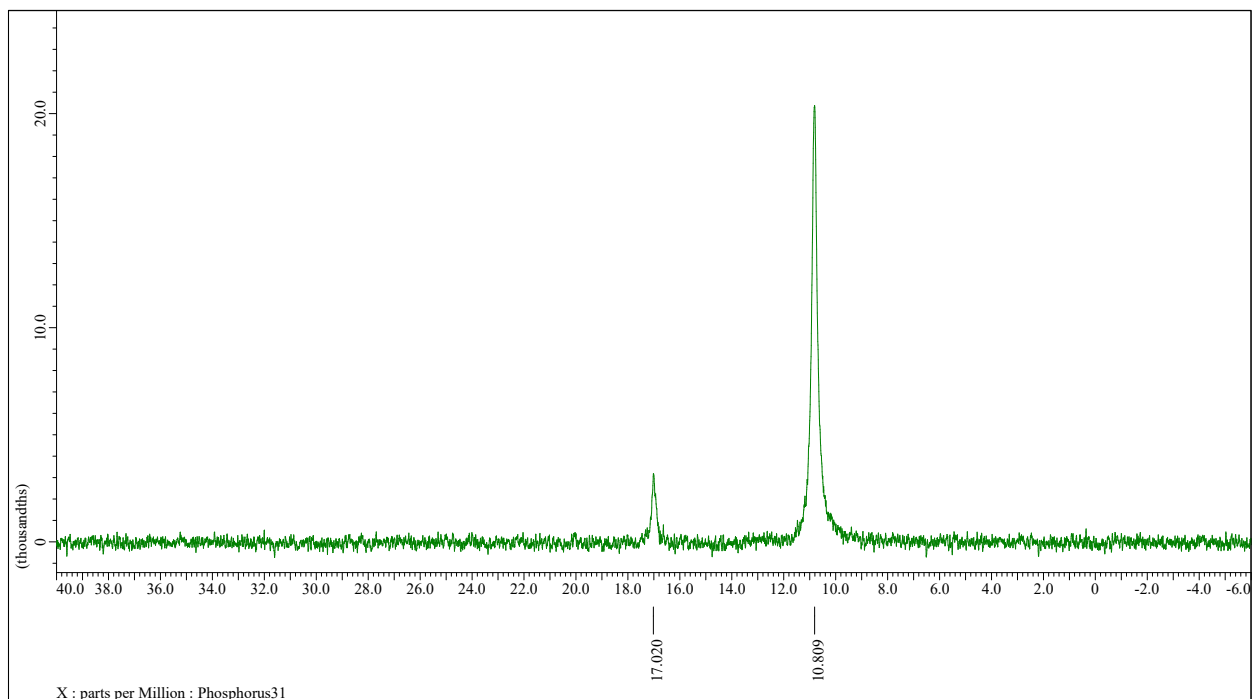

(c)

**Figure S8.** (a)  $^1\text{H}$  NMR, (b)  $^{13}\text{C}$  NMR and (c)  $^{31}\text{P}$  NMR spectra of (4-((3*aR*,8*aR*)-2,2-dimethyl-6-oxido-4,4,8,8-tetraphenyltetrahydro-[1,3]dioxolo[4,5-*e*][1,3,2]dioxaphosphepin-6-yl))-(1*R*,6*R*)-3-oxo-2,5-diazabicyclo[4.4.0]decan 2g.

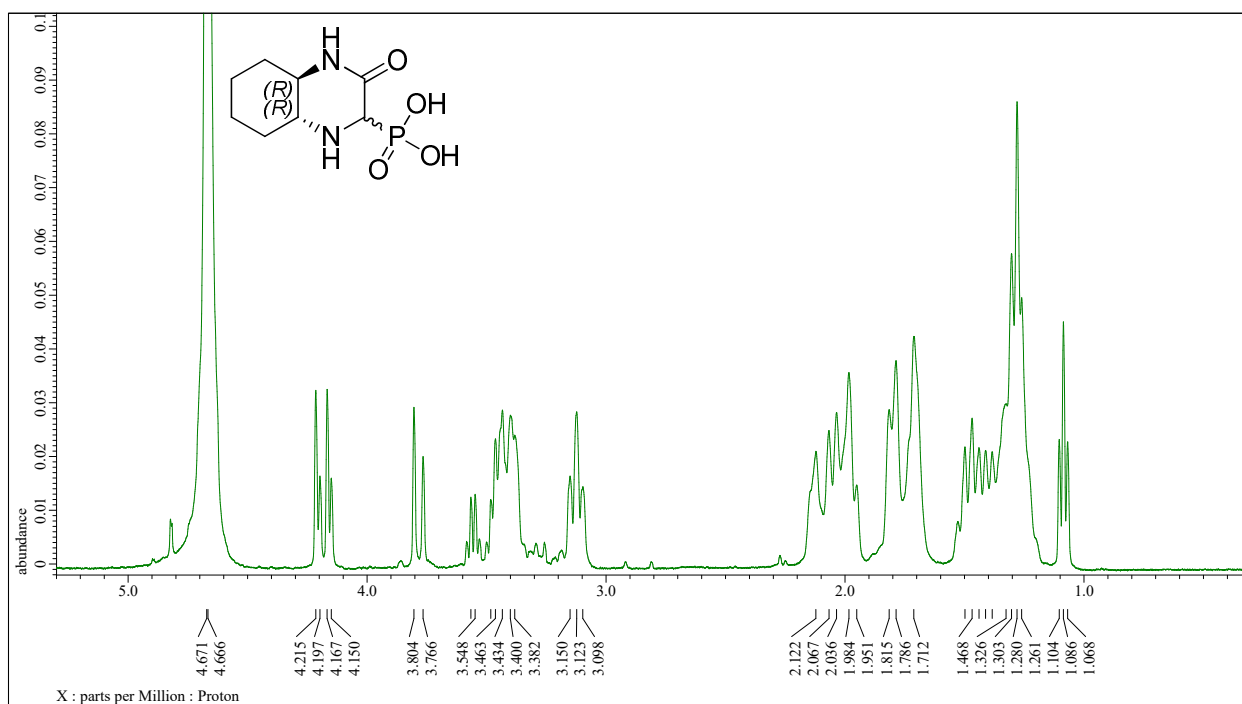

(a)

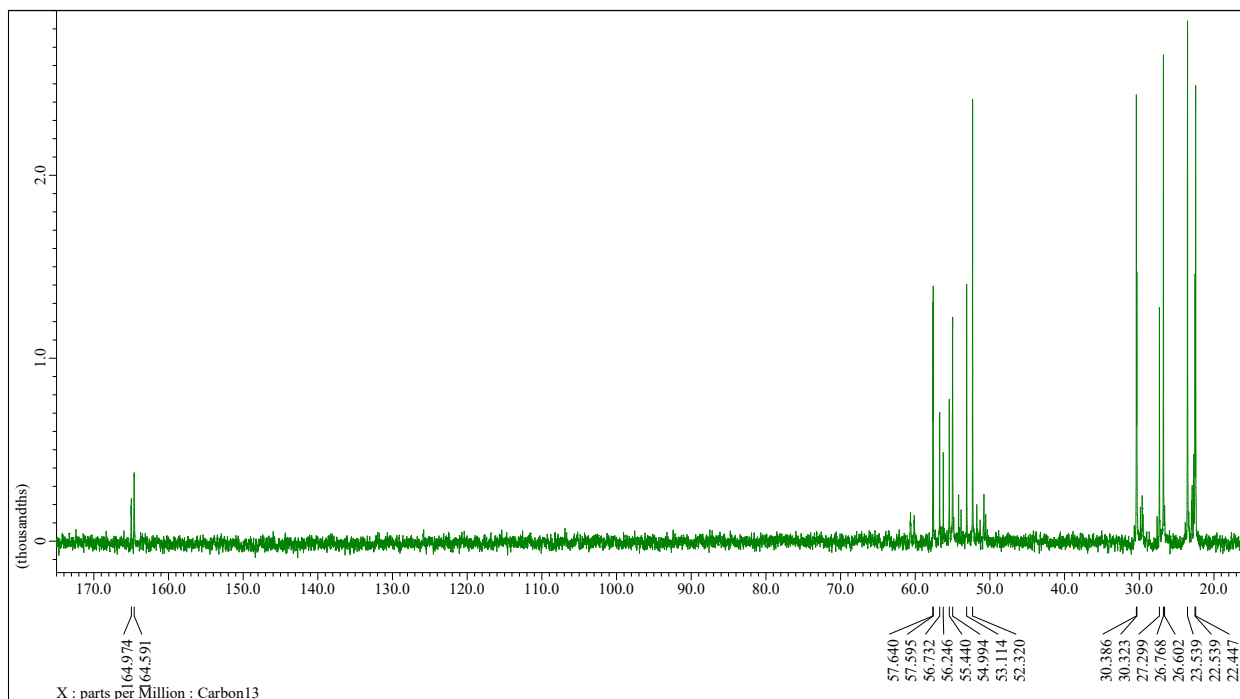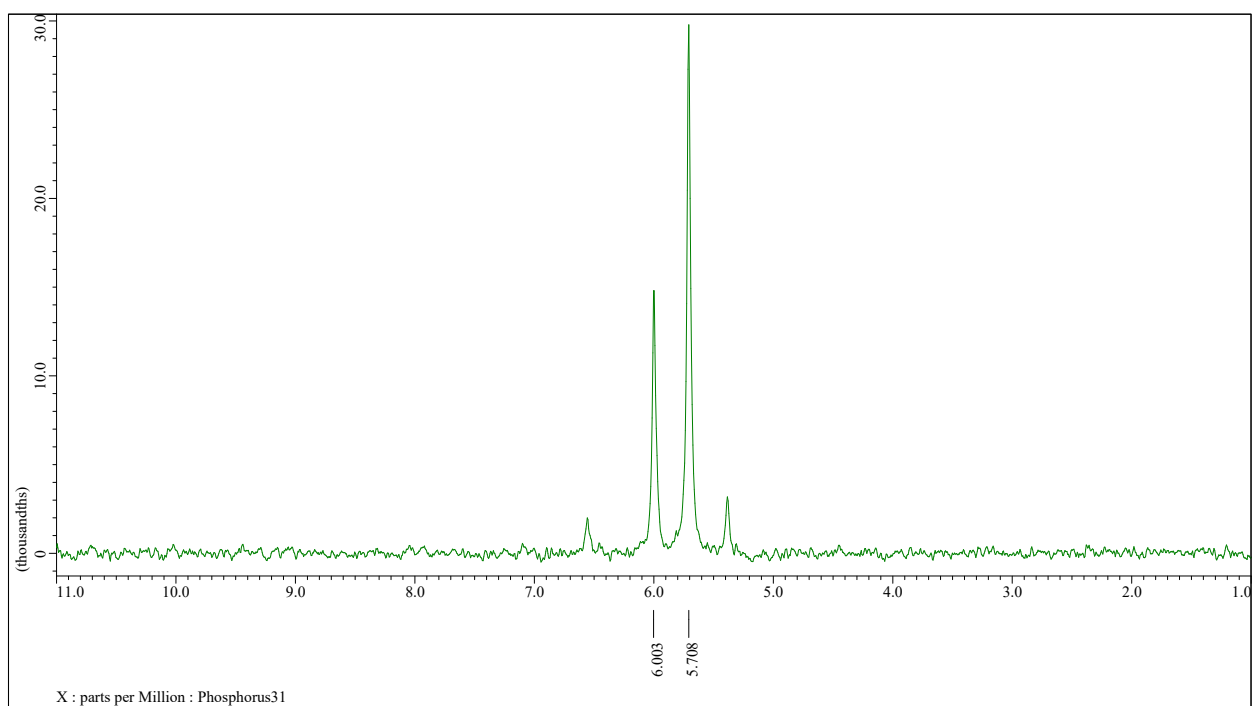

**Figure S9.** (a)  $^1\text{H}$  NMR, (b)  $^{13}\text{C}$  NMR and (c)  $^{31}\text{P}$  NMR spectra of [(1R,6R)-3-oxo-2,5-diazabicyclo[4.4.0]dec-4-yl]-phosphonic acid 3a.

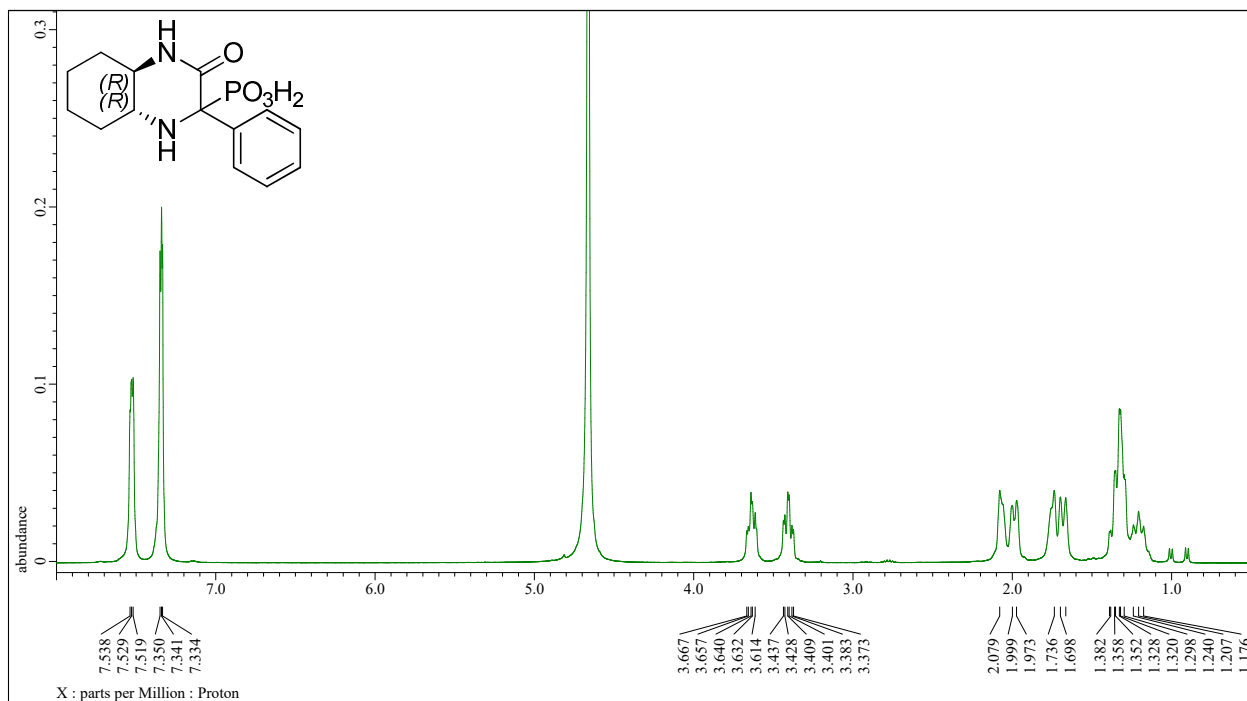

(a)

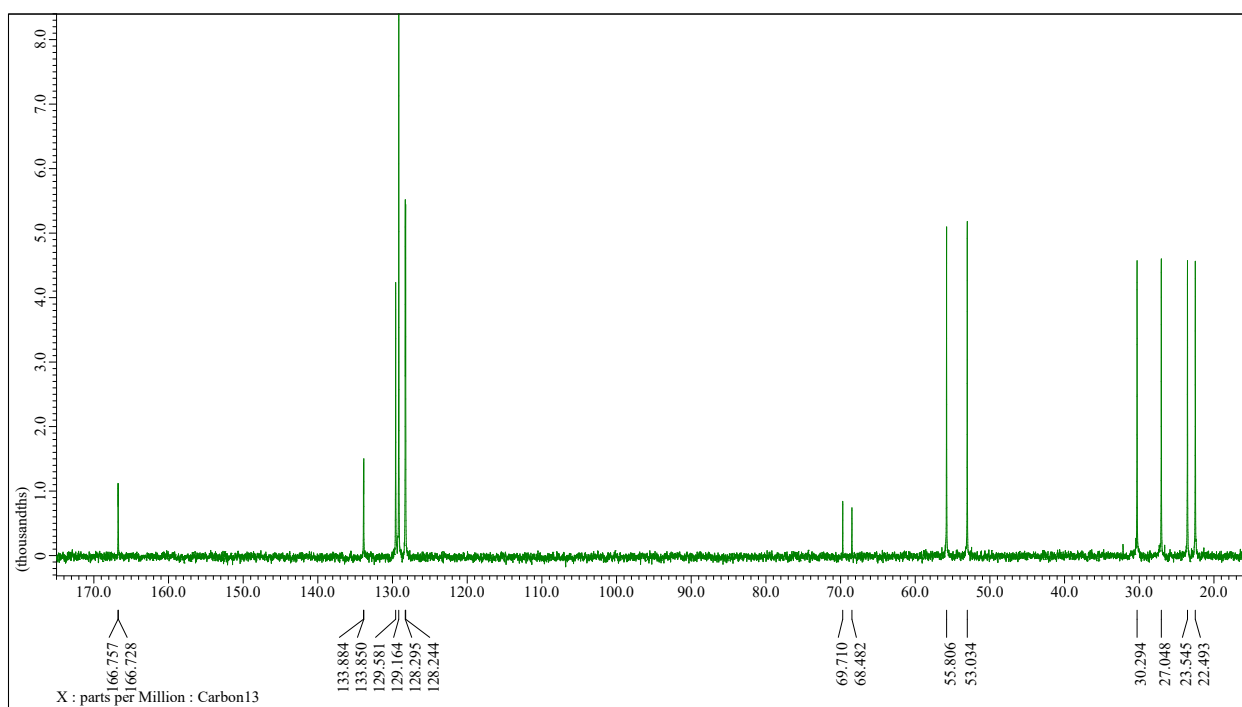

(b)

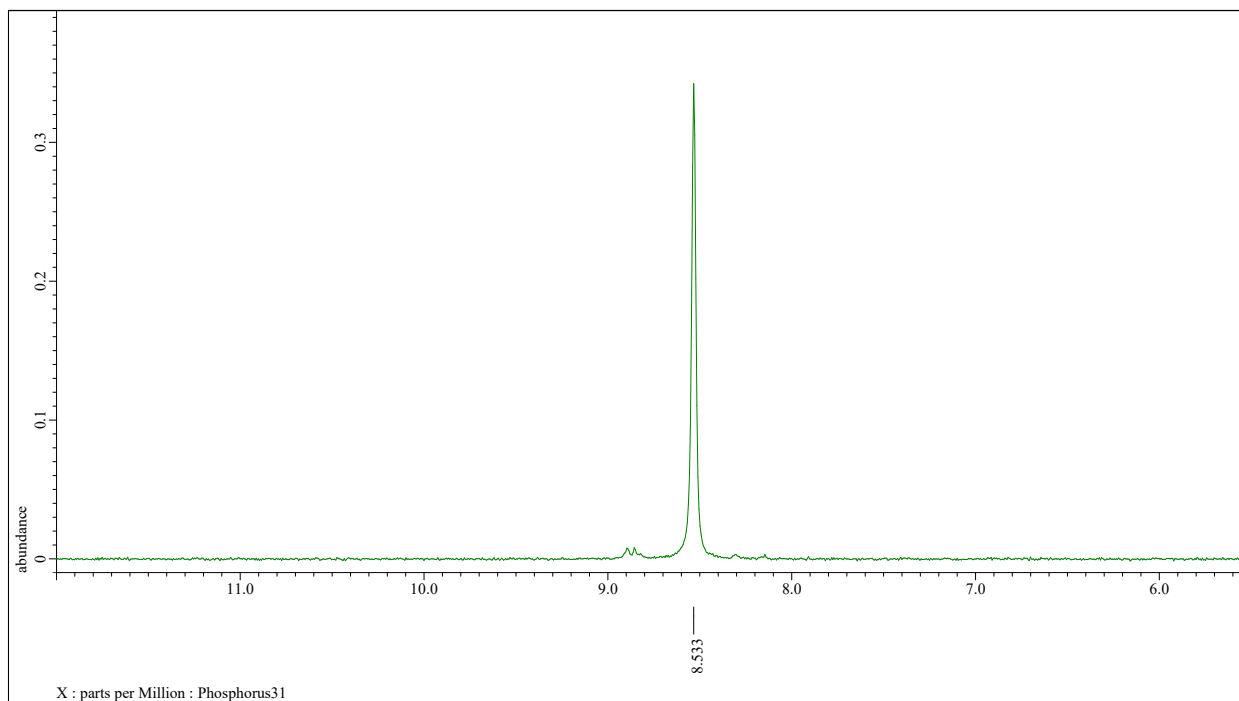

(c)

**Figure S10.** (a)  $^1\text{H}$  NMR, (b)  $^{13}\text{C}$  NMR and (c)  $^{31}\text{P}$  NMR spectra of [4-phenyl-(1*R*,6*R*)-3-oxo-2,5-diazabicyclo[4.4.0]dec-4-yl]-phosphonic acid 3b.

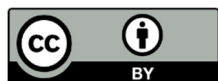

© 2020 by the authors. Submitted for possible open access publication under the terms and conditions of the Creative Commons Attribution (CC BY) license (<http://creativecommons.org/licenses/by/4.0/>).
